# Supplementary material
Source: PubMed Central journal article supplement (PMC4775435)
Supplement: NIHMS720811-supplement-3.pdf [file NIHMS720811-supplement-3.pdf]

© 2000-2014 Ingenuity Systems, Inc. All rights reserved.

| ID        | Genes in d: | Prediction | (Log Ratio) | Findings      | shared genes with p53-like cohort |
|-----------|-------------|------------|-------------|---------------|-----------------------------------|
| ILMN_1680 | AURKA       | Activated  | -1.358      | Downregulate  | Yes                               |
| ILMN_1690 | FERMT2      | Activated  | 0.816       | Upregulate    | Yes                               |
| ILMN_1695 | PPP1CA      | Affected   | -0.621      | Regulates     | (Yes)                             |
| ILMN_1720 | CRYAB       | Activated  | 1.202       | Upregulate    | Yes                               |
| ILMN_1740 | TSC22D3     | Activated  | 1.444       | Upregulate    | Yes                               |
| ILMN_1750 | FEN1        | Activated  | -0.916      | Downregulate  | Yes                               |
| ILMN_1780 | CCNA2       | Activated  | -0.889      | Downregulate  | Yes                               |
| ILMN_1785 | COL14A1     | Inhibited  | 1.036       | Downregulate  | Yes                               |
| ILMN_1790 | TPX2        | Activated  | -1.474      | Downregulate  | Yes                               |
| ILMN_1800 | FHL1        | Activated  | 1.926       | Upregulate    | Yes                               |
| ILMN_1810 | CNN1        | Activated  | 1.551       | Upregulate    | Yes                               |
| ILMN_1811 | KIF23       | Activated  | -1.218      | Downregulate  | Yes                               |
| ILMN_1811 | CSR1        | Activated  | 0.687       | Upregulate    | Yes                               |
| ILMN_2067 | CCND2       | Activated  | 1.070       | Upregulate    | Yes                               |
| ILMN_2077 | RACGAP1     | Affected   | -1.515      | Regulates     | (Yes)                             |
| ILMN_1653 | CDK2        | Affected   | -0.811      | Regulates     | (2)                               |
| ILMN_1654 | HMGB2       | Affected   | -0.786      | Regulates     | (1)                               |
| ILMN_1650 | DUSP5       | Activated  | 1.438       | Upregulates   | (4)                               |
| ILMN_1657 | MVD         | Affected   | -0.621      | Regulates     | (1)                               |
| ILMN_1661 | DDIT4       | Activated  | 0.740       | Upregulates   | (9)                               |
| ILMN_1663 | UBE2B       | Inhibited  | 0.678       | Downregulates | (1)                               |
| ILMN_1663 | CDC20       | Activated  | -1.152      | Downregulates | (3)                               |
| ILMN_1664 | CYP51A1     | Affected   | 0.941       | Regulates     | (1)                               |
| ILMN_1660 | RBBP6       | Affected   | 0.864       | Regulates     | (1)                               |
| ILMN_1660 | FOS         | Inhibited  | 2.108       | Downregulates | (6)                               |
| ILMN_1670 | PCDH7       | Activated  | 1.138       | Upregulates   | (1)                               |
| ILMN_1671 | BAI3        | Activated  | 1.876       | Upregulates   | (2)                               |
| ILMN_1672 | TMED7       | Affected   | 0.731       | Regulates     | (1)                               |
| ILMN_1672 | TCF7L2      | Inhibited  | 0.687       | Downregulates | (2)                               |
| ILMN_1670 | FN1         | Inhibited  | 1.183       | Downregulates | (2)                               |
| ILMN_1677 | PTGS2       | Inhibited  | 2.536       | Downregulates | (23)                              |
| ILMN_1670 | ESR1        | Activated  | 1.470       | Upregulates   | (9)                               |
| ILMN_1670 | DFFB        | Inhibited  | -0.667      | Upregulates   | (3)                               |
| ILMN_1682 | IER3        | Activated  | 1.021       | Upregulates   | (12)                              |
| ILMN_1683 | SMC4        | Activated  | -0.737      | Downregulates | (1)                               |
| ILMN_1683 | NCAPD3      | Affected   | -0.837      | Regulates     | (1)                               |
| ILMN_1680 | ASL         | Inhibited  | -0.737      | Upregulates   | (1)                               |
| ILMN_1680 | SHROOM3     | Activated  | 0.934       | Upregulates   | (2)                               |
| ILMN_1680 | PDGFA       | Inhibited  | -1.252      | Upregulates   | (2)                               |
| ILMN_1680 | THBS1       | Activated  | 1.183       | Upregulates   | (7)                               |
| ILMN_1687 | HSP90AA1    | Activated  | -1.252      | Downregulates | (2)                               |
| ILMN_1687 | PHLDA1      | Activated  | 0.856       | Upregulates   | (1)                               |
| ILMN_1680 | EDIL3       | Activated  | 1.299       | Upregulates   | (1)                               |
| ILMN_1691 | ATG4B       | Affected   | 0.872       | Regulates     | (1)                               |
| ILMN_1691 | IL4R        | Inhibited  | 0.740       | Downregulates | (1)                               |

|           |          |           |        |                    |
|-----------|----------|-----------|--------|--------------------|
| ILMN_1692 | VMP1     | Affected  | 0.604  | Regulates (3)      |
| ILMN_1693 | VEGFA    | Inhibited | 1.406  | Downregulates (19) |
| ILMN_1695 | BMF      | Activated | -1.556 | Downregulates (2)  |
| ILMN_1696 | CDC42    | Activated | 0.722  | Upregulates (2)    |
| ILMN_1696 | NEO1     | Activated | 0.949  | Upregulates (1)    |
| ILMN_1697 | MAP2K6   | Activated | -0.971 | Downregulates (4)  |
| ILMN_1698 | IL6      | Inhibited | 3.338  | Downregulates (23) |
| ILMN_1700 | SCN3B    | Activated | 1.269  | Upregulates (7)    |
| ILMN_1701 | GBP1     | Activated | 0.740  | Upregulates (1)    |
| ILMN_1701 | BCL2     | Inhibited | 1.057  | Downregulates (57) |
| ILMN_1703 | HJURP    | Affected  | -1.786 | Regulates (1)      |
| ILMN_1704 | RPS6KB1  | Affected  | 1.526  | Regulates (4)      |
| ILMN_1705 | H2AFY2   | Inhibited | -0.971 | Upregulates (1)    |
| ILMN_1708 | NFATC2IP | Activated | -0.889 | Downregulates (2)  |
| ILMN_1709 | PRDX2    | Inhibited | -1.474 | Upregulates (1)    |
| ILMN_1709 | IGF1     | Inhibited | 1.575  | Downregulates (9)  |
| ILMN_1710 | BCL3     | Inhibited | 0.642  | Downregulates (1)  |
| ILMN_1711 | SERPING1 | Affected  | 0.888  | Regulates (1)      |
| ILMN_1711 | NUDT5    | Inhibited | -0.713 | Upregulates (1)    |
| ILMN_1711 | RAD54B   | Activated | -1.322 | Downregulates (1)  |
| ILMN_1712 | AIFM2    | Inhibited | -0.889 | Upregulates (3)    |
| ILMN_1713 | PRKCB    | Affected  | 1.257  | Regulates (4)      |
| ILMN_1714 | TPD52L1  | Affected  | 1.465  | Regulates (2)      |
| ILMN_1714 | NFKB1    | Affected  | 0.848  | Regulates (2)      |
| ILMN_1716 | STARD4   | Activated | 1.233  | Upregulates (1)    |
| ILMN_1716 | FOXM1    | Affected  | -1.837 | Regulates (1)      |
| ILMN_1718 | INHBA    | Activated | 1.098  | Upregulates (1)    |
| ILMN_1720 | CCL2     | Inhibited | 0.848  | Downregulates (1)  |
| ILMN_1720 | ZFP36    | Activated | 1.696  | Upregulates (1)    |
| ILMN_1722 | EGR3     | Inhibited | 2.676  | Downregulates (1)  |
| ILMN_1727 | RLIM     | Inhibited | 0.766  | Downregulates (1)  |
| ILMN_1731 | PDRG1    | Activated | -0.971 | Downregulates (2)  |
| ILMN_1732 | KIAA0101 | Activated | -1.184 | Downregulates (5)  |
| ILMN_1733 | CDC25A   | Activated | -1.322 | Downregulates (4)  |
| ILMN_1734 | MKI67    | Activated | -1.690 | Downregulates (2)  |
| ILMN_1735 | ATG2B    | Activated | 0.748  | Upregulates (4)    |
| ILMN_1736 | ME1      | Inhibited | 1.084  | Downregulates (6)  |
| ILMN_1736 | CDC42EP3 | Activated | 0.642  | Upregulates (1)    |
| ILMN_1738 | LIF      | Activated | 1.795  | Upregulates (4)    |
| ILMN_1739 | NLRP12   | Inhibited | 1.333  | Downregulates (1)  |
| ILMN_1740 | PANK1    | Inhibited | -1.889 | Upregulates (10)   |
| ILMN_1740 | KCNMA1   | Activated | 1.967  | Upregulates (1)    |
| ILMN_1744 | SERPINE1 | Activated | 1.778  | Upregulates (18)   |
| ILMN_1744 | CAND1    | Inhibited | 0.832  | Downregulates (1)  |
| ILMN_1744 | FGF2     | Affected  | 1.748  | Regulates (5)      |
| ILMN_1745 | LAPTM4A  | Affected  | 0.748  | Regulates (3)      |
| ILMN_1745 | TGFBR1   | Inhibited | 0.963  | Downregulates (1)  |

|           |          |           |        |                    |
|-----------|----------|-----------|--------|--------------------|
| ILMN_1749 | TLR6     | Activated | -0.761 | Downregulates (1)  |
| ILMN_1755 | DBI      | Inhibited | -0.916 | Upregulates (1)    |
| ILMN_1758 | CSTF1    | Activated | -1.322 | Downregulates (1)  |
| ILMN_1760 | PTP4A1   | Inhibited | 1.465  | Downregulates (2)  |
| ILMN_1761 | VAMP4    | Affected  | 0.722  | Regulates (3)      |
| ILMN_1762 | SEC62    | Affected  | 1.021  | Regulates (2)      |
| ILMN_1762 | ZEB1     | Activated | 0.722  | Upregulates (1)    |
| ILMN_1762 | EGR1     | Inhibited | 1.465  | Downregulates (12) |
| ILMN_1768 | GAS6     | Activated | 0.926  | Upregulates (2)    |
| ILMN_1768 | BHLHE40  | Activated | 0.722  | Upregulates (8)    |
| ILMN_1771 | GTSE1    | Inhibited | -1.889 | Upregulates (4)    |
| ILMN_1771 | FOSL1    | Activated | 1.281  | Upregulates (3)    |
| ILMN_1774 | HSPD1    | Activated | -1.218 | Downregulates (1)  |
| ILMN_1776 | MYL9     | Activated | 0.660  | Upregulates (3)    |
| ILMN_1777 | KCTD11   | Activated | 1.098  | Upregulates (2)    |
| ILMN_1778 | FKBP5    | Activated | 0.941  | Upregulates (2)    |
| ILMN_1781 | DUSP1    | Activated | 1.104  | Upregulates (4)    |
| ILMN_1783 | ING3     | Affected  | 0.614  | Regulates (1)      |
| ILMN_1788 | LTBP1    | Activated | 1.251  | Upregulates (2)    |
| ILMN_1791 | ATF3     | Activated | 4.038  | Upregulates (8)    |
| ILMN_1791 | HMGB1    | Inhibited | 0.623  | Downregulates (1)  |
| ILMN_1792 | STAG1    | Activated | 0.774  | Upregulates (1)    |
| ILMN_1794 | SNRK     | Activated | 0.816  | Upregulates (1)    |
| ILMN_1802 | RHOB     | Activated | 1.029  | Upregulates (2)    |
| ILMN_1803 | BIRC5    | Activated | -1.434 | Downregulates (32) |
| ILMN_1804 | AREG/ARE | Activated | 0.903  | Upregulates (2)    |
| ILMN_1806 | JUN      | Affected  | 1.118  | Regulates (2)      |
| ILMN_1811 | E2F8     | Affected  | -1.358 | Regulates (1)      |
| ILMN_1813 | P2RX4    | Inhibited | -1.120 | Upregulates (1)    |
| ILMN_1814 | MDM2     | Inhibited | -0.837 | Upregulates (268)  |
| ILMN_1814 | SPC25    | Inhibited | -1.120 | Upregulates (2)    |
| ILMN_1814 | AGTR1    | Activated | 1.609  | Upregulates (4)    |
| ILMN_1815 | MCM5     | Activated | -1.120 | Downregulates (2)  |
| ILMN_2044 | PPP3CA   | Inhibited | 0.722  | Downregulates (1)  |
| ILMN_2062 | GAS1     | Affected  | 1.787  | Regulates (1)      |
| ILMN_2063 | CLIC4    | Activated | 1.163  | Upregulates (10)   |
| ILMN_2073 | IL10     | Affected  | 2.982  | Regulates (2)      |
| ILMN_2086 | JUNB     | Activated | 0.669  | Upregulates (3)    |
| ILMN_2098 | PMAIP1   | Activated | 1.214  | Upregulates (36)   |
| ILMN_2111 | PDCD6IP  | Activated | 0.978  | Upregulates (9)    |
| ILMN_2115 | CTGF     | Affected  | 1.043  | Regulates (2)      |
| ILMN_2121 | HBEGF    | Activated | 1.757  | Upregulates (4)    |
| ILMN_2126 | RPS27L   | Activated | 0.774  | Upregulates (5)    |
| ILMN_2131 | GNAI1    | Activated | 1.239  | Upregulates (1)    |
| ILMN_2137 | KLF4     | Activated | 1.485  | Upregulates (2)    |
| ILMN_2147 | MAN2A1   | Activated | 0.856  | Upregulates (1)    |
| ILMN_2153 | ATXN1    | Activated | 1.077  | Upregulates (1)    |

|           |           |           |        |                    |
|-----------|-----------|-----------|--------|--------------------|
| ILMN_2174 | DKK1      | Activated | 2.293  | Upregulates (9)    |
| ILMN_2176 | UNC5B     | Activated | -0.837 | Downregulates (3)  |
| ILMN_2184 | ANXA1     | Activated | 0.651  | Upregulates (5)    |
| ILMN_2188 | CYR61     | Affected  | 1.642  | Regulates (1)      |
| ILMN_2190 | CHIC1     | Affected  | 1.057  | Regulates (2)      |
| ILMN_2196 | PPP2CA    | Affected  | 0.816  | Regulates (4)      |
| ILMN_2201 | SLC19A2   | Affected  | 1.183  | Regulates (3)      |
| ILMN_2215 | WWP1      | Affected  | 1.138  | Regulates (1)      |
| ILMN_2222 | TMSB10/TI | Activated | 0.660  | Upregulates (2)    |
| ILMN_2236 | SON       | Inhibited | 0.731  | Downregulates (1)  |
| ILMN_2260 | CCNB1IP1  | Affected  | -0.786 | Regulates (3)      |
| ILMN_2266 | FHL2      | Inhibited | -0.761 | Upregulates (2)    |
| ILMN_2266 | SORBS1    | Activated | 1.778  | Upregulates (4)    |
| ILMN_2294 | RFWD2     | Activated | 0.595  | Upregulates (3)    |
| ILMN_2294 | PRDM1     | Activated | 1.373  | Upregulates (1)    |
| ILMN_2296 | SMC2      | Activated | -1.059 | Downregulates (3)  |
| ILMN_2301 | UBE2C     | Activated | -1.218 | Downregulates (2)  |
| ILMN_2308 | AKAP12    | Inhibited | 1.604  | Downregulates (1)  |
| ILMN_2316 | FAS       | Activated | 0.978  | Upregulates (69)   |
| ILMN_2326 | PMS2      | Affected  | -0.644 | Regulates (3)      |
| ILMN_2340 | PDE4B     | Inhibited | 2.074  | Downregulates (1)  |
| ILMN_2341 | KITLG     | Affected  | 1.077  | Regulates (2)      |
| ILMN_2358 | MAD1L1    | Activated | -1.000 | Downregulates (14) |
| ILMN_2366 | RAD51     | Inhibited | 1.978  | Downregulates (1)  |
| ILMN_2364 | MBNL2     | Affected  | 0.766  | Regulates (1)      |
| ILMN_2376 | CSF2RA    | Activated | 0.872  | Upregulates (1)    |
| ILMN_2376 | HIF1A     | Inhibited | 1.202  | Downregulates (13) |
| ILMN_2380 | CCNG1     | Activated | 0.642  | Upregulates (45)   |
| ILMN_2386 | TGFB111   | Activated | 0.918  | Upregulates (2)    |
| ILMN_2396 | CHEK2     | Activated | -0.690 | Downregulates (10) |
| ILMN_2398 | ASNS      | Affected  | 1.170  | Regulates (18)     |
| ILMN_2401 | UHRF1     | Affected  | -0.889 | Regulates (1)      |
| ILMN_2406 | VAPA      | Activated | 1.118  | Upregulates (1)    |
| ILMN_2406 | PIDD      | Inhibited | -1.184 | Upregulates (19)   |
| ILMN_3251 | LDHA      | Inhibited | 0.774  | Downregulates (2)  |
| ILMN_3251 | HDAC2     | Inhibited | -0.811 | Upregulates (1)    |
| ILMN_3306 | SGK1      | Activated | 1.536  | Upregulates (6)    |
