# Supplementary material
Source: PubMed Central journal article supplement (PMC4775435)

# Discovery cohort

# MVAC-Avastin

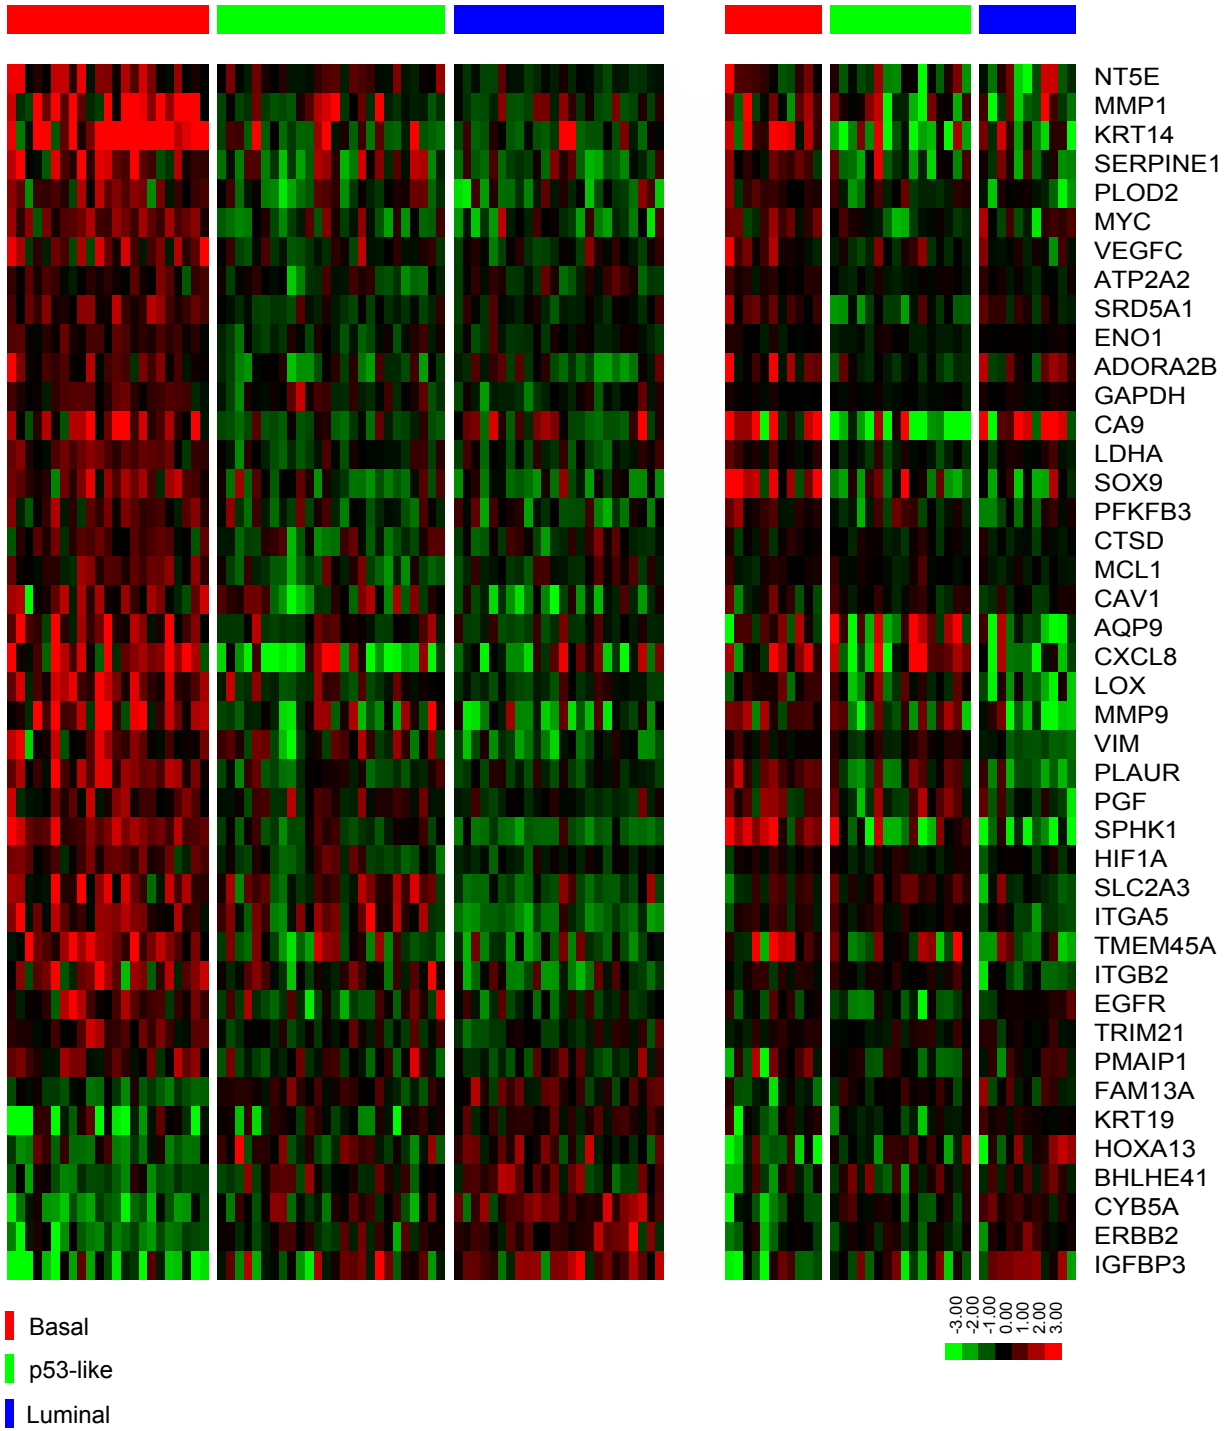

Supplement: NIHMS720811-supplement-2.pdf [file NIHMS720811-supplement-2.pdf]
